1 **Bordetella Colonization Factor A (BcfA) elicits protective immunity against**  
2 ***Bordetella bronchiseptica* in the absence of an additional adjuvant**

3 Kacy S. Yount<sup>1</sup>, Jamie Jennings-Gee<sup>2</sup>, Kyle Caution<sup>1</sup>, Audra R. Fullen<sup>1</sup>, Kara N. Corps<sup>3</sup>,  
4 Sally Quataert<sup>4</sup>, Rajendar Deora<sup>1,5\*</sup>, Purnima Dubey<sup>1\*</sup>

5 1 Department of Microbial Infection & Immunity, The Ohio State University

6 2 Department of Microbiology & Immunology, Wake Forest University Health Sciences

7 3 College of Veterinary Medicine, Department of Veterinary Biosciences, The Ohio  
8 State University

9 4 Human Immunology Center Laboratory, University of Rochester Medical Center

10 5 Department of Microbiology, The Ohio State University

11 \* Address correspondence to Purnima Dubey, PhD or Rajendar Deora, PhD

12 E-mail: [purnima.dubey@osumc.edu](mailto:purnima.dubey@osumc.edu); [rajendar.deora@osumc.edu](mailto:rajendar.deora@osumc.edu)

13 Phone: 614-292-9447

14 Conflicts: RD holds a patent on BcfA (patent number US20150147332A1)

15 **ABSTRACT**

16 *Bordetella bronchiseptica* (*B. bronchiseptica*) is an etiologic agent of respiratory  
17 diseases in animals and humans. Despite widespread use of veterinary *B.*  
18 *bronchiseptica* vaccines, there is limited information on their composition, relative  
19 efficacy, and the immune responses they elicit. Furthermore, human *B. bronchiseptica*  
20 vaccines are not available. We leveraged the dual antigenic and adjuvant functions of  
21 BcfA to develop acellular *B. bronchiseptica* vaccines in the absence of an additional  
22 adjuvant. Balb/c mice immunized with BcfA alone or a trivalent vaccine containing BcfA  
23 and the *Bordetella* antigens FHA and Prn were equally protected against challenge with  
24 a prototype *B. bronchiseptica* strain. The trivalent vaccine protected mice significantly  
25 better than the canine vaccine Bronchicine<sup>®</sup> and provided protection against a *B.*  
26 *bronchiseptica* strain isolated from a dog with kennel cough. Th1/17-polarized immune  
27 responses correlate with long-lasting protection against *Bordetellae* and other  
28 respiratory pathogens. Notably, BcfA strongly attenuated the Th2 responses elicited by  
29 FHA/Prn, resulting in Th1/17-skewed responses in inherently Th2-skewed Balb/c mice.  
30 Thus, BcfA functions as both an antigen and an adjuvant, providing protection as a  
31 single component vaccine. BcfA-adjuvanted vaccines may improve the efficacy and  
32 durability of vaccines against *Bordetellae* and other pathogens.

33

## 34 INTRODUCTION

35 *Bordetella bronchiseptica* (*B. bronchiseptica*) is an animal pathogen with a wide  
36 host range, infecting farm and companion animals(1-6). It is one of the etiologic agents  
37 of kennel cough, or canine infectious respiratory disease (CIRD)(7). *B. bronchiseptica* is  
38 also increasingly isolated from immunocompromised humans such as those with  
39 HIV/AIDS, cancer, or cystic fibrosis. In many of these cases, the infections are linked to  
40 exposure to pets with *B. bronchiseptica*(8-10).

41 A nasal live attenuated(11) and a parenteral cellular antigen extract (CAe)  
42 vaccine (Bronchicine)(12) against *B. bronchiseptica* are widely used to minimize kennel  
43 cough outbreaks. The CAe formulation replaced more reactogenic whole cell inactivated  
44 vaccines in parallel to the development of acellular pertussis vaccines (aPV). However,  
45 a human vaccine against *B. bronchiseptica* is not available. Although antigens  
46 expressed by *B. bronchiseptica* are present in aPV against the human pathogen, *B.*  
47 *pertussis*(13, 14), these vaccines are only partially effective against *B.*  
48 *bronchiseptica*(15).

49 While considerable efforts have been devoted to evaluation of the immune  
50 response and effectiveness of aPV, there is insufficient research to determine the  
51 effectiveness of CAe *B. bronchiseptica* vaccines. Dogs vaccinated with CAe produced  
52 serum IgG and IgA and had reduced bacterial burden compared to unvaccinated  
53 dogs(16, 17). However, minor vaccine-related side effects were observed and coughing  
54 in 20% of immunized animals was reported, suggesting that the vaccine does not  
55 provide complete protection against disease(17). Furthermore, information on the  
56 immune response and protective efficacy of these vaccines is limited(12). Thus, there is

57 an urgent need for well-defined, immunogenic acellular vaccines against *B.*  
58 *bronchiseptica* for veterinary and human use.

59 Together, Th1/17 cellular responses and Th1-skewed antibody responses  
60 provide long-lasting protective immunity against *Bordetellae*(18). At present, all aPV are  
61 adjuvanted with alum(13, 14), which elicits Th2-skewed cellular and humoral responses  
62 with sub-optimal and short-lived protection(18, 19). While alum does not cause pyrexia  
63 and has the strongest safety record of any adjuvant used in human vaccines(20), there  
64 have been reports of adverse reactions in animals and humans(21, 22). Thus,  
65 development of improved adjuvants is a pressing objective for more effective control of  
66 both veterinary and human diseases.

67 We previously reported identification of *Bordetella* colonization factor A (BcfA),  
68 an outer membrane protein expressed by *B. bronchiseptica* but not by the human  
69 pathogen, *B. pertussis*(23). BcfA is a paralog of outer membrane protein BipA and has  
70 significant homology to intimins and invasins of other bacteria(23). We showed that an  
71 experimental vaccine containing BcfA adsorbed to alum elicited protective immune  
72 responses against *B. bronchiseptica*(24).

73 BcfA is also an adjuvant that elicits Th1/Th17 cytokine responses and Th1-type  
74 antibodies to protein antigens(25) potentially serving as an alternative adjuvant to alum.  
75 In the present study, we tested the efficacy of BcfA as a monovalent vaccine and  
76 combined with *Bordetella* virulence factors FHA and Prn. We found that Th2-prone  
77 Balb/c mice immunized with BcfA as an antigen and without an additional adjuvant  
78 elicited Th1/17-polarized responses and efficiently cleared a *B. bronchiseptica* infection  
79 from the lungs and trachea. A combination vaccine containing BcfA and two *Bordetella*

80 proteins FHA and Prn(14) also provided protection against laboratory and canine  
81 isolates of *B. bronchiseptica*. Protection by the BcfA-containing vaccine was superior to  
82 that provided by a current veterinary CAe vaccine. Together, our data show that the  
83 adjuvant and antigenic properties of BcfA will elicit highly protective immune responses  
84 against *B. bronchiseptica* for veterinary and human applications. Additionally, BcfA can  
85 function as an adjuvant to enhance immune responses against pathogens for which  
86 Th1/Th17 immune responses correlate with better protection(26, 27).

87

## 88 **RESULTS**

### 89 **Immunization with BcfA as a single antigen in the absence of another adjuvant** 90 **reduces *B. bronchiseptica* colonization of the mouse respiratory tract.**

91 We previously reported that immunization with BcfA/Alum protected mice against  
92 *B. bronchiseptica* challenge(24). BcfA also enhanced immune responses to  
93 heterologous antigens and to *Bordetella* vaccine antigens FHA and Prn(25). These  
94 results suggested a dual protective function of BcfA as an antigen and an adjuvant.  
95 Here, we first tested the hypothesis that BcfA as the sole component would protect  
96 against *B. bronchiseptica* infection in the absence of alum. Balb/c mice (male and  
97 female) were immunized intramuscularly (i.m.) with BcfA/Alum or BcfA alone (as  
98 described in Methods), and challenged with the prototype *B. bronchiseptica* laboratory  
99 strain RB50 (originally isolated from a rabbit)(28). CFUs in the lungs and trachea were  
100 enumerated at 4 days post-infection (dpi). Both immunizations protected the lungs and  
101 trachea of mice compared to naïve unimmunized mice. Bacterial burden was similar in

102 both organs from mice immunized with BcfA/Alum or BcfA alone (Fig 1), demonstrating  
103 that alum is dispensable for protection mediated by BcfA.

104 **A trivalent BcfA-adjuvanted vaccine is highly protective against *B. bronchiseptica***

105         FHA and Prn are *Bordetella* proteins that are antigens in aPV(13, 14) and have  
106 roles in adherence and pathogenesis of the human and animal pathogens(29-31). We  
107 tested whether a trivalent vaccine (BcfA/FHA/Prn) would provide superior protection  
108 compared to BcfA alone. Balb/c mice immunized with BcfA alone, FHA/Prn, or  
109 BcfA/FHA/Prn were challenged with RB50. CFUs were enumerated from lungs and  
110 trachea at 3 or 7 dpi. At both time points, the lungs (Fig 2A, 2B) and trachea (Fig 2C,  
111 2D) of naïve challenged mice were highly colonized by RB50. Compared to FHA/Prn-  
112 immunized mice, BcfA-immunized mice had significantly reduced bacterial burden in the  
113 lungs at 3 dpi, with CFUs at or below the limit of detection (20 CFUs) in 4 out of 8 mice  
114 (Fig 2A). At 7 dpi, compared to naïve challenged mice, both FHA/Prn- and BcfA-  
115 immunized mice exhibited reduced bacterial burden in the lungs (FIG 2B) and trachea  
116 (Fig 2D).

117         While one mouse immunized with BcfA/FHA/Prn had no detectable bacteria in  
118 the lungs (Fig 2A) or trachea (Fig 2C) at 3 dpi, the average bacterial load was not  
119 significantly different than FHA/Prn- or BcfA-immunized mice. At 7 dpi, BcfA/FHA/Prn  
120 immunization was significantly better than FHA/Prn, with  $\sim 2 \log_{10}$  lower bacterial load in  
121 both organs (Fig 2B, 2D). Strikingly, there was no statistical difference between the  
122 bacterial burdens of BcfA/FHA/Prn- and BcfA-immunized mice. Together, these data  
123 show that BcfA alone, without an additional adjuvant, and a trivalent BcfA-containing  
124 vaccine reduce bacterial load in the lungs and trachea.

125 **Immunization with BcfA alone elicits an antibody response of similar magnitude**  
126 **but with a more pronounced Th1-skewed phenotype compared to BcfA/Alum**

127 We previously reported that BcfA/Alum immunization elicited BcfA-specific IgG2  
128 antibodies in C57BL/6 mice(24). This observation was noteworthy because alum-  
129 adjuvanted vaccines including aPV elicit Th2-polarized responses(18, 32-34) and  
130 because Th1/17, but not Th2, responses are critical for immunity against  
131 *Bordetellae*(18). We evaluated BcfA-specific antibodies in the serum of mice immunized  
132 with BcfA/Alum, BcfA, or BcfA/FHA/Prn. All three immunizations produced a similar  
133 level of total IgG in the serum (Fig 3A) and lungs (Fig 3B).

134 We observed a higher ratio of BcfA-specific IgG2a/IgG1 in the serum (Fig 3C)  
135 and lungs (Fig 3D) of mice immunized with BcfA alone or with BcfA/FHA/Prn compared  
136 to with BcfA/Alum. Thus, removing alum from the vaccine reduces the Th2-type of BcfA-  
137 specific antibodies while maintaining the magnitude of the IgG response. In addition, a  
138 higher ratio of IgG2/IgG1 antibodies suggests a Th1-polarized response that is  
139 correlated with better protection against *Bordetella* infection(18, 35, 36).

140 **BcfA elicits Th1-type antibody responses to FHA**

141 FHA and Prn alone or adjuvanted to alum elicit Th2-skewed antibody  
142 responses(25). To determine whether BcfA remodeled these responses towards Th1  
143 we evaluated the systemic and mucosal IgG levels and calculated the ratio of FHA- and  
144 Prn-specific IgG2/IgG1 antibodies elicited by BcfA/FHA/Prn. FHA-specific IgG was  
145 higher in the serum (Fig 4A) and lungs (Fig 4C) of FHA/Prn- and BcfA/FHA/Prn-  
146 immunized mice compared to naïve mice, while Prn-specific antibody levels were

147 increased in the serum (Fig 4B), but not the lungs (Fig 4D). We observed a higher ratio  
148 of FHA-specific IgG2b/IgG1 in the serum (Fig 4E) and lungs (Fig 4G) of mice  
149 immunized with BcfA/FHA/Prn compared to FHA/Prn alone. These data suggest that  
150 the adjuvant function of BcfA shifts the antibody response to FHA toward Th1 by  
151 reducing the Th2-type antibodies. In contrast, the Prn-specific antibody ratios were not  
152 altered (FIG 4F).

153 **Immunization with BcfA/FHA/Prn elicits Th1/17 cytokine production and**  
154 **attenuates Th2 cytokine production.**

155 We showed that murine bone marrow dendritic cells stimulated with BcfA  
156 produced Th1/17 polarizing innate cytokines including IL-12/23. Furthermore, the  
157 addition of BcfA to aPV elicited Th1/17-polarized immune responses in C57BL/6 mice  
158 by attenuating the Th2 cytokine responses observed with alum-adjuvanted aPV(25).  
159 C57BL/6 mice have an inherently Th1-skewed immune phenotype(37). Here, we tested  
160 whether immunization of the Th2-prone Balb/c mouse strain(37) with a BcfA-adjuvanted  
161 vaccine would similarly shift T cell responses towards Th1/17.

162 To evaluate systemic responses, splenocytes from FHA/Prn- and BcfA/FHA/Prn-  
163 immunized mice were stimulated *in vitro* with FHA, Prn, or BcfA for 7 days, and  
164 quantified cytokines present in the supernatants by ELISA. Splenocytes from  
165 BcfA/FHA/Prn immunized mice produced significantly lower amounts of Th2 cytokines  
166 IL-5 (Fig 5A) and IL-13 (Fig 5B) compared to FHA/Prn-immunized spleen cells. Similar  
167 levels of FHA- and Prn-specific Th1 effector cytokine IFN $\gamma$  (Fig 5C) and Th17 effector  
168 cytokine IL-17 (Fig 5D) were produced by both immunizations while high levels of BcfA-  
169 specific IFN $\gamma$  and IL-17 (FIG 5C, 5D) were produced from spleens of BcfA/FHA/Prn-



170 immunized mice. Together, these results show that, by inhibiting the production of Th2  
171 cytokines, BcfA skews responses away from Th2 and toward Th1/Th17 in a Th2-prone  
172 mouse strain.

173 **BcfA/FHA/Prn provides better protection against a laboratory and a clinical strain**  
174 **of *B. bronchiseptica* than a commercial cellular antigen extract vaccine.**

175 We compared protection provided by BcfA or BcfA/FHA/Prn to that provided by  
176 Bronchicine<sup>®</sup>, a widely used but insufficiently characterized veterinary vaccine. Mice  
177 were immunized with BcfA/FHA/Prn or BcfA as above or with 1/10<sup>th</sup> or 1/5<sup>th</sup> canine dose  
178 of Bronchicine<sup>®</sup>, doses similar to those of human aPV commonly tested in mice(25, 38).  
179 Immunized and naïve mice were subsequently challenged with RB50 or with MBORD  
180 685, a canine *B. bronchiseptica* strain isolated from a dog with kennel cough(3). Overall,  
181 colonization of the respiratory tract of naïve and immunized mice by MBORD 685 was  
182 equivalent to colonization by the rabbit isolate RB50 (Fig 6A,B). While all four  
183 immunizations reduced bacterial burden compared to naïve mice, BcfA/FHA/Prn  
184 immunization most efficiently reduced bacterial burden in the lungs (Fig 6A) and trachea  
185 (Fig 6B). Immunization with BcfA alone was significantly more protective than 1/10<sup>th</sup> but  
186 not 1/5<sup>th</sup> dose Bronchicine<sup>®</sup> in both the lungs (Fig 6A) and trachea (Fig 6B). Importantly,  
187 both doses of Bronchicine<sup>®</sup> were significantly less protective in the lungs of immunized  
188 mice than BcfA/FHA/Prn (Fig 6A). The lungs of 83% of mice immunized with  
189 BcfA/FHA/Prn were cleared of *B. bronchiseptica* below the limit of detection while only -  
190 23% and 50% were cleared by 1/10 and 1/5 dose Bronchicine<sup>®</sup>, respectively (Fig 6A).  
191 Together, these results support the clinical applicability of either monovalent BcfA or

192 trivalent BcfA/FHA/Prn as veterinary vaccines and provide a new avenue for more  
193 effective and, potentially, durable protection against this pathogen.

194 **BcfA/FHA/Prn elicits more robust antigen-specific antibody responses than a**  
195 **commercial veterinary vaccine.**

196 We observed similar FHA- and Prn-specific antibody levels between 1/10  
197 Bronchicine<sup>®</sup>-immunized mice and naïve mice (see Fig 4). In contrast, immunization  
198 with BcfA/FHA/Prn elicited higher serum antibody responses to all three antigens (Fig  
199 6C) and lung antibody responses to BcfA and FHA (Fig 6D). Together, these results  
200 show that BcfA/FHA/Prn elicits a stronger immune response and is more protective than  
201 Bronchicine<sup>®</sup> in a murine model of *B. bronchiseptica* infection.

202 **Immunization reduces inflammation in the lungs of mice challenged with *B.***  
203 ***bronchiseptica*.**

204 *B. bronchiseptica* infection of unimmunized mice causes considerable damage to  
205 lung tissues(24, 39). We determined whether immunization decreased lung injury  
206 compared to unimmunized mice. Blinded H&E sections were evaluated for several  
207 parameters of lung injury and immune cell infiltration (Supplemental Table 1). As  
208 expected, total pathology score for naïve challenged mice (Fig 7A) was highest,  
209 exhibiting severe degeneration and airway necrosis that resulted in airway obliteration,  
210 markedly thickened alveolar walls and considerable influx of viable and degenerate  
211 polymorphonuclear cells (PMNs).

212 In contrast, immunized mice (Fig 7B-D) had significantly lower pathology scores  
213 compared to naïve mice (Fig 7E), as well as reduced degeneration/necrosis (Fig 7F)

214 and infiltrating airway PMNs (Fig 7G). Bronchicine<sup>®</sup>(1/10 dose)-immunized mice  
215 exhibited significantly more infiltrating lymphocytes and plasma cells (Fig 7H) compared  
216 to lungs of BcfA and BcfA/FHA/Prn-immunized animals. Thus, there are qualitative  
217 differences between highly effective BcfA-containing vaccines and the poorly protective  
218 Bronchicine<sup>®</sup>.

219

## 220 **DISCUSSION**

221         There is an urgent need for improved vaccines against *B. bronchiseptica* since  
222 respiratory diseases caused by this pathogen are a significant health concern for  
223 animals and humans. Although vaccines are widely used in veterinary medicine to  
224 prevent kennel cough in dogs, information regarding their composition, immune profile  
225 or protective efficacy is sparse. An effective vaccine must contain protective antigens  
226 that elicit strong immune responses and adjuvants that heighten the response and elicit  
227 immune phenotypes that reflect the responses generated by natural infection. Cellular  
228 Th1/17 responses and humoral Th1-skewed responses generated by whole cell  
229 vaccines or natural infection are required for long-lived protection against *Bordetellae*  
230 (18) and other pathogens (26, 27).

231         Though alum has been used successfully as a vaccine adjuvant since the early  
232 1900s to prevent disease, it elicits Th2-skewed responses and thus weaker and shorter-  
233 lived immunity(40). Thus, substituting alum with Th1/17 polarizing adjuvants is likely to  
234 improve vaccine-induced immunity. We previously showed that BcfA elicits Th1/17  
235 responses in C57BL/6 mice(25). To determine the full potential of BcfA in the absence

236 of alum to mediate protective shifts in immune responses, we administered BcfA-  
237 containing vaccines to the Th2-prone mouse strain, Balb/c(37). Cellular and humoral  
238 responses to BcfA, FHA, and Prn were remodeled to Th1/17, primarily by attenuating  
239 Th2 cytokine production. This also resulted in a higher ratio of IgG2/IgG1 antibodies.  
240 Together, these data provide further evidence of the adjuvant activity and immune  
241 modulatory functions of BcfA.

242 Animals immunized with BcfA alone reduced RB50 bacterial CFUs as effectively  
243 as mice immunized with BcfA/Alum, demonstrating that BcfA is a protective antigen and  
244 does not require an additional adjuvant. It is striking that a single protein is a strong  
245 antigen and adjuvant. Conversely, other well-characterized *Bordetella* virulence factors  
246 such as FHA(41, 42), adenylate cyclase toxin (ACT)(43), lipooligosaccharide (LOS)(44),  
247 and BopN(45) shift the cellular immune response away from Th1 and/or toward Th2.  
248 Thus, it is notable that the BcfA-containing vaccine characterized in this study  
249 attenuates the Th2 responses elicited by FHA.

250 We hypothesized that the trivalent BcfA/FHA/Prn vaccine would be more  
251 effective than BcfA alone due to the presence of two additional antigens. Surprisingly,  
252 the protection provided by this combination was not significantly better than BcfA alone,  
253 although cytokine and antibody responses to FHA were detected. We did not detect  
254 strong responses to Prn, suggesting that this antigen may be dispensable.  
255 Furthermore, allelic variants of Prn in *B. bronchiseptica* are reported(46, 47), implying  
256 that Prn-specific responses may not be protective due to antigenic drift among  
257 circulating strains. We showed previously that *B. bronchiseptica* isolates from dogs  
258 (including MBORD 685 used in this study), cats, horses, pigs, and humans highly

259 express BcfA (10, 24). Production of BcfA by strains isolated from companion and food-  
260 producing animals strengthens its utility as a protective antigen in a novel vaccine, a  
261 possibility supported by our data showing that both BcfA alone and BcfA/FHA/Prn  
262 immunizations reduced MBORD 685 bacterial CFUs.

263 To determine the relative efficacy of our acellular formulations to currently used  
264 veterinary vaccines, we compared the protection provided by BcfA/FHA/Prn to  
265 Bronchicine<sup>®</sup>. FHA and Prn have been detected at low levels in Bronchicine<sup>®</sup>(16), and  
266 we detected low levels of BcfA (data not shown). Thus, despite shared antigenicity,  
267 BcfA/FHA/Prn immunization elicited stronger responses and provided superior  
268 protection compared to this current veterinary vaccine. Differences in antigen quantity  
269 (unknown in Bronchicine<sup>®</sup>) may, at least in part, explain the difference in protection. In  
270 addition, Bronchicine<sup>®</sup> elicits weaker antibody responses than previous whole cell  
271 bacterin vaccines, likely due to the reduction of LOS, which adjuvants immune  
272 responses but is also reactogenic(12). Furthermore, CAe formulations may present  
273 inhibitory proteins or polysaccharides that attenuate effector responses(48, 49).  
274 Differences in the composition and volume of immune cell infiltration elicited by the CAe  
275 or BcfA-containing vaccines may also contribute to varied protection.

276 Together, our data suggest that an acellular component vaccine, leveraging the  
277 dual antigenic and adjuvant function of BcfA as a monovalent or trivalent vaccine  
278 formulation, has strong potential as a novel immunization approach for animal and  
279 human respiratory diseases mediated by *B. bronchiseptica*. Furthermore, the adjuvant  
280 function of BcfA may improve immunity against other bacterial and viral pathogens that  
281 require Th1/17 responses for protection against disease(26, 27).

282

## 283 **MATERIALS AND METHODS**

284 **Bacterial strains, media, and growth conditions.** Wild-type *B. bronchiseptica* strain  
285 RB50(28), and canine isolate MBORD 685(3), were maintained on Bordet-Gengou (BG)  
286 agar (Difco) containing 7.5% defibrinated sheep's blood supplemented with 100 µg/ml  
287 streptomycin. For animal inoculations, liquid cultures from single colonies were grown at  
288 37°C on a roller drum to OD<sub>600</sub> ≈ 1.0 in Stainer-Scholte medium and 100 µg/ml  
289 streptomycin.

290 **Animals.** All experiments were reviewed and approved by the Ohio State University  
291 Institutional Animal Care and Use Committee (Protocol #2017A00000090). Balb/c mice  
292 (male and female, 6 to 21 weeks old) were bred in-house.

293 **Reagents.** FHA and Prn derived from *B. pertussis* were purchased from Kaketsuken  
294 (Japan) and List Biologicals (Campbell, CA), respectively. BcfA was produced and  
295 purified as described previously(23). Endotoxin levels in all proteins were at acceptable  
296 levels and below that of aPV(50). Bronchicine® CAe (Zoetis) was purchased from OSU  
297 Veterinary Biosciences pharmacy. RPMI was from Thermo Fisher Scientific (Waltham,  
298 MA). Fetal bovine serum (FBS) was from Sigma-Aldrich (St. Louis, MO). ELISA kits  
299 were from eBioscience (Thermo Fisher Scientific).

300 **Immunizations.** Mice were lightly anesthetized with 2.5% isoflurane–O<sub>2</sub> for i.m  
301 immunization on day 0 and boost on day 28-35 as demonstrated previously(51) with the  
302 following vaccines: a) 1/10<sup>th</sup> or 1/5<sup>th</sup> canine dose of Bronchicine® or b) 100 µl of  
303 experimental acellular vaccine containing varying combinations of 1.6 µg FHA, 0.5 µg

304 Prn, and 30 µg BcfA. In alum-containing immunizations, 130 µg of aluminum hydroxide  
305 colloidal suspension (Sigma) was used.

306 **Bacterial challenge.** Bacterial strains RB50 and MBORD685 grown overnight to OD<sub>600</sub>  
307 ≈ 1.0 were diluted in PBS to 1x10<sup>5</sup>-5x10<sup>5</sup> bacteria per 50 µl. On days 14-20 post-boost,  
308 mice were lightly anesthetized with 2.5% isoflurane–O<sub>2</sub> and the 50 µl inoculum was  
309 delivered to both nares as demonstrated previously(51).

310 **Colony enumeration.** Mice were euthanized at 3-7 dpi and the lungs, trachea, nasal  
311 septum, spleen, and blood were harvested as demonstrated previously(51). Respiratory  
312 tract tissues were mechanically disrupted in PBS + 1% casein and various dilutions  
313 were plated on BG agar containing 7.5% sheep's blood and supplemented with 100  
314 µg/ml streptomycin. Colony forming units (CFUs) were counted after 2 days of  
315 incubation at 37° C. Data were transformed to log<sub>10</sub>. Dotted line in each Figure indicates  
316 limit of detection at 20 CFUs for lungs and 3 CFUs for trachea.

317 **Splenocyte stimulation and ELISAs.** Spleens were dissociated and red blood cells  
318 were lysed. Single cell suspension was plated at 2.5 × 10<sup>6</sup> cells/well of complete T cell  
319 media (RPMI, 10% FBS, 10 µg/ml gentamicin, 5 × 10<sup>-5</sup> M 2-mercaptoethanol) and  
320 stimulated with 1 µg/ml FHA, Prn, or BcfA or media alone as negative control.  
321 Supernatant was collected on day 7 post-stimulation. Production of IFN $\gamma$ , IL-5, IL-13  
322 and IL-17 was quantified by sandwich ELISA according to the manufacturer's  
323 instructions.

324 **Antibody analysis.** Purified antigens were coupled through an amine linkage to  
325 MagPlex C magnetic microspheres (Luminex Corporation), each with a unique

326 fluorescent bead region address, and combined to form a 5-plex microarray. Mouse  
327 serum or lung homogenates were diluted in assay buffer, PBS–0.1% Brij-35–1% bovine  
328 serum albumin (BSA), pH 7.2, and incubated with the beads for 2 h at room  
329 temperature (r.t.) in the dark while shaking at 800 rpm. After washing, appropriate  
330 biotinylated detection antibody was added, i.e., goat anti-mouse total IgG, rat anti-IgG1,  
331 rat anti-IgG2a, rat anti-IgG2b, or goat anti-IgG2c, at a 1:250 dilution in assay buffer for 1  
332 h at r.t. After washing, streptavidin-phycoerythrin (SA-PE) at 1:250 in assay buffer was  
333 added for 1 h with shaking. Unbound SA-PE was removed by washing, and the beads  
334 were resuspended in 100 µl PBS prior to reading on a Luminex 200 flow cytometer.  
335 Antibody isotype and subclass values are reported in arbitrary fluorescent intensity  
336 units. Antibody ratios were calculated by dividing the fluorescent intensity units of Ig2a  
337 or IgG2b by IgG1 after subtracting background and accounting for sample dilution.

338 **Histology and Scoring.** The superior lobe of the right lung was harvested from mice 3-  
339 4 dpi and fixed in 2 ml of 10% neutral buffered formalin for at least 24 h. Tissues were  
340 processed, and embedded in paraffin. Five micron sections (3 per tissue) were stained  
341 with hematoxylin and eosin by the Comparative Pathology & Mouse Phenotyping  
342 Shared Resource at The Ohio State University. A board-certified veterinary pathologist  
343 (KNC) was blinded to experimental groups and sections were scored qualitatively 0-5  
344 for degree of cellularity and consolidation, thickness of alveolar walls, degeneration and  
345 necrosis, edema, hemorrhage, infiltrating alveolar/interstitial polymorphonuclear cells  
346 (PMNs), intrabronchial PMNs, perivascular and peribronchial lymphocytes and plasma  
347 cells, and alveolar macrophages. Total inflammation score was calculated by totaling  
348 the qualitative assessments in each category.



349 **Statistical analysis.** Bacterial CFUs and antibody levels were evaluated using a one-  
350 way analysis of variance (ANOVA) with Holm-Sidak correction for multiple comparisons  
351 for experiments with 3 or more groups and using student's t-test for experiments with 2  
352 groups. For grouped analyses of CFUs, two-way ANOVA with Holm-Sidak correction for  
353 multiple comparisons was used to compare immunization groups. Antibody ratios and  
354 cytokine levels were evaluated by multiple student's t-tests with Holm-Sidak correction  
355 for multiple comparisons. Pathology scores were evaluated using a one-way ANOVA  
356 with Holm-Sidak correction for multiple comparisons.

357 **Acknowledgements.** This work was supported by RO1AI125560, funds from Wake  
358 Forest Innovations, and start-up funds from The Ohio State University. We acknowledge  
359 Jennifer Bruno, Jessica Brown, Jessica Ferman, and Bhavneep Kaur for technical  
360 assistance, and the Comparative Pathology Core laboratory at OSU for tissue  
361 processing. We thank Eugene Oltz for critical review of the manuscript.

362 **Author Contributions.** KSY, PD, and RD designed experiments. KSY, JJ-G, KC and  
363 AF conducted experiments. SQ conducted antibody analysis and KNC conducted  
364 histology analysis. KSY, PD, and RD interpreted data and wrote the manuscript.

365 **Disclosures.** BcfA is patented under US patent number 20150147332A1.

366

367

368 **REFERENCES**

369

- 370 1. El Garch F, de Jong A, Simjee S, Moyaert H, Klein U, Ludwig C, Marion H, Haag-  
371 Diergarten S, Richard-Mazet A, Thomas V, Siegwart E. 2016. Monitoring of  
372 antimicrobial susceptibility of respiratory tract pathogens isolated from diseased  
373 cattle and pigs across Europe, 2009-2012: VetPath results. *Vet Microbiol* 194:11-  
374 22.
- 375 2. M'Gowan JP. 1911. Some observations on a laboratory epidemic, principally  
376 among dogs and cats, in which the animals affected presented the symptoms of  
377 the disease called "distemper". *The Journal of Pathology and Bacteriology*  
378 doi:10.1002/path.1700150311.
- 379 3. Sacco RE, Register KB, Nordholm GE. 2000. Restriction Endonuclease Analysis  
380 Discriminates *Bordetella bronchiseptica* Isolates. *Journal of Clinical Microbiology*  
381 38:4387-4393.
- 382 4. Nicholson TL, Conover MS, Deora R. 2012. Transcriptome profiling reveals  
383 stage-specific production and requirement of flagella during biofilm development  
384 in *Bordetella bronchiseptica*. *PLoS One* 7:e49166.
- 385 5. Cattelan N, Dubey P, Arnal L, Yantorno OM, Deora R. 2016. *Bordetella* biofilms:  
386 a lifestyle leading to persistent infections. *Pathog Dis* 74:ftv108.
- 387 6. Brockmeier SL, Register KB, Nicholson TL, Loving CL. 2019. Bordetellosis, p  
388 767-777. *In* Zimmerman JJ, Karriker LA, Ramirez A, Schwartz KJ, Stevenson  
389 GW, Zhang J (ed), *Diseases of Swine* doi:10.1002/9781119350927.ch49.

- 390 7. Lavan R, Knesl O. 2015. Prevalence of canine infectious respiratory pathogens  
391 in asymptomatic dogs presented at US animal shelters. *J Small Anim Pract*  
392 56:572-6.
- 393 8. Szvalb AD, Rolston KV, Mori N, Tarrand JJ, Mulanovich VE. 2019. Infections with  
394 the agent of 'kennel cough' in patients with cancer. *J Infect* 78:48-53.
- 395 9. Dworkin MS, Sullivan PS, Buskin SE, Harrington RD, Olliffe J, MacArthur RD,  
396 Lopez CE. 1999. *Bordetella bronchiseptica* infection in human immunodeficiency  
397 virus-infected patients. *Clin Infect Dis* 28:1095-9.
- 398 10. Sukumar N, Nicholson TL, Conover MS, Ganguly T, Deora R. 2014. Comparative  
399 Analyses of a Cystic Fibrosis Isolate of *Bordetella bronchiseptica* Reveal  
400 Differences in Important Pathogenic Phenotypes. *Infection and Immunity*  
401 82:1627-1637.
- 402 11. Ellis JA, Krakowka GS, Dayton AD, Konoby C. 2002. Comparative efficacy of an  
403 injectable vaccine and an intranasal vaccine in stimulating *Bordetella*  
404 *bronchiseptica*-reactive antibody responses in seropositive dogs. *J Am Vet Med*  
405 *Assoc* 220:43-8.
- 406 12. Ellis JA. 2015. How well do vaccines for *Bordetella bronchiseptica* work in dogs?  
407 A critical review of the literature 1977-2014. *Vet J* 204:5-16.
- 408 13. Klein NP. 2014. Licensed pertussis vaccines in the United States: History and  
409 current state. *Human Vaccines & Immunotherapeutics* 10:2684-2690.
- 410 14. Edwards KM, Meade BD, Decker MD, Reed GF, Rennels MB, Steinhoff MC,  
411 Anderson EL, Englund JA, Pichichero ME, Deloria MA. 1995. Comparison of 13

- 412           acellular pertussis vaccines: overview and serologic response. *Pediatrics* 96:548-  
413           57.
- 414 15.   Gopinathan L, Kirimanjeswara GS, Wolfe DN, Kelley ML, Harvill ET. 2007.  
415           Different mechanisms of vaccine-induced and infection-induced immunity to  
416           *Bordetella bronchiseptica*. *Microbes Infect* 9:442-8.
- 417 16.   Ellis J, Rhodes C, Lacoste S, Krakowka S. 2014. Antibody responses to  
418           *Bordetella bronchiseptica* in vaccinated and infected dogs. *Can Vet J* 55:857-64.
- 419 17.   Shade FJ, Rapp VJ. 1982. Studies of a bacterin incorporating an extracted  
420           *Bordetella bronchiseptica* antigen for controlling canine bordetellosis. *Veterinary*  
421           *Medicine Small Animal Clinician*.
- 422 18.   Mills KH, Ross PJ, Allen AC, Wilk MM. 2014. Do we need a new vaccine to  
423           control the re-emergence of pertussis? *Trends Microbiol* 22:49-52.
- 424 19.   Spickler AR, Roth JA. 2003. Adjuvants in veterinary vaccines: modes of action  
425           and adverse effects. *J Vet Intern Med* 17:273-81.
- 426 20.   Petrovsky N, Aguilar JC. 2004. Vaccine adjuvants: current state and future  
427           trends. *Immunol Cell Biol* 82:488-96.
- 428 21.   Vascellari M, Melchioni E, Bozza MA, Mutinelli F. 2003. Fibrosarcomas at  
429           presumed sites of injection in dogs: characteristics and comparison with non-  
430           vaccination site fibrosarcomas and feline post-vaccinal fibrosarcomas. *J Vet Med*  
431           *A Physiol Pathol Clin Med* 50:286-91.
- 432 22.   Cherin P, Gherardi RK. 2000. Macrophagic myofasciitis. *Curr Rheumatol Rep*  
433           2:196-200.

- 434 23. Sukumar N, Mishra M, Sloan GP, Ogi T, Deora R. 2007. Differential Bvg phase-  
435 dependent regulation and combinatorial role in pathogenesis of two *Bordetella*  
436 paralogs, BipA and BcfA. *J Bacteriol* 189:3695-704.
- 437 24. Sukumar N, Love CF, Conover MS, Kock ND, Dubey P, Deora R. 2009. Active  
438 and passive immunizations with *Bordetella* colonization factor A protect mice  
439 against respiratory challenge with *Bordetella bronchiseptica*. *Infect Immun*  
440 77:885-95.
- 441 25. Jennings-Gee J, Quataert S, Ganguly T, D'Agostino R, Jr., Deora R, Dubey P.  
442 2018. The adjuvant *Bordetella* Colonization Factor A attenuates alum-induced  
443 Th2 responses and enhances *Bordetella pertussis* clearance from mouse lungs.  
444 *Infect Immun* doi:10.1128/iai.00935-17.
- 445 26. Lin L, Ibrahim AS, Xu X, Farber JM, Avanesian V, Baquir B, Fu Y, French SW,  
446 Edwards JE, Jr., Spellberg B. 2009. Th1-Th17 Cells Mediate Protective Adaptive  
447 Immunity against *Staphylococcus aureus* and *Candida albicans* Infection in Mice.  
448 *PLOS Pathogens* 5:e1000703.
- 449 27. Lyadova IV, Panteleev AV. 2015. Th1 and Th17 Cells in Tuberculosis:  
450 Protection, Pathology, and Biomarkers. *Mediators Inflamm* 2015:854507.
- 451 28. Cotter PA, Miller JF. 1994. BvgAS-mediated signal transduction: analysis of  
452 phase-locked regulatory mutants of *Bordetella bronchiseptica* in a rabbit model.  
453 *Infect Immun* 62:3381-90.
- 454 29. Relman DA, Domenighini M, Tuomanen E, Rappuoli R, Falkow S. 1989.  
455 Filamentous hemagglutinin of *Bordetella pertussis*: nucleotide sequence and  
456 crucial role in adherence. *Proc Natl Acad Sci U S A* 86:2637-41.

- 457 30. Leininger E, Roberts M, Kenimer JG, Charles IG, Fairweather N, Novotny P,  
458 Brennan MJ. 1991. Pertactin, an Arg-Gly-Asp-containing Bordetella pertussis  
459 surface protein that promotes adherence of mammalian cells. Proc Natl Acad Sci  
460 U S A 88:345-9.
- 461 31. Nicholson TL, Brockmeier SL, Loving CL. 2009. Contribution of Bordetella  
462 bronchiseptica filamentous hemagglutinin and pertactin to respiratory disease in  
463 swine. Infect Immun 77:2136-46.
- 464 32. Ryan M, Murphy G, Ryan E, Nilsson L, Shackley F, Gothefors L, Oymar K, Miller  
465 E, Storsaeter J, Mills KH. 1998. Distinct T-cell subtypes induced with whole cell  
466 and acellular pertussis vaccines in children. Immunology 93:1-10.
- 467 33. Ausiello CM, Lande R, Urbani F, la Sala A, Stefanelli P, Salmaso S, Mastrantonio  
468 P, Cassone A. 1999. Cell-mediated immune responses in four-year-old children  
469 after primary immunization with acellular pertussis vaccines. Infect Immun  
470 67:4064-71.
- 471 34. Ryan EJ, Nilsson L, Kjellman N, Gothefors L, Mills KH. 2000. Booster  
472 immunization of children with an acellular pertussis vaccine enhances Th2  
473 cytokine production and serum IgE responses against pertussis toxin but not  
474 against common allergens. Clin Exp Immunol 121:193-200.
- 475 35. Mosmann TR, Coffman RL. 1989. Heterogeneity of cytokine secretion patterns  
476 and functions of helper T cells. Adv Immunol 46:111-47.
- 477 36. Stevens TL, Bossie A, Sanders VM, Fernandez-Botran R, Coffman RL,  
478 Mosmann TR, Vitetta ES. 1988. Regulation of antibody isotype secretion by  
479 subsets of antigen-specific helper T cells. Nature 334:255-8.

- 480 37. Charles PC, Weber KS, Cipriani B, Brosnan CF. 1999. Cytokine, chemokine and  
481 chemokine receptor mRNA expression in different strains of normal mice:  
482 implications for establishment of a Th1/Th2 bias. *J Neuroimmunol* 100:64-73.
- 483 38. Mills KHG, Ryan M, Ryan E, Mahon BP. 1998. A Murine Model in Which  
484 Protection Correlates with Pertussis Vaccine Efficacy in Children Reveals  
485 Complementary Roles for Humoral and Cell-Mediated Immunity in Protection  
486 against *Bordetella pertussis*. *Infection and Immunity* 66:594-602.
- 487 39. Harvill ET, Cotter PA, Yuk MH, Miller JF. 1999. Probing the function of *Bordetella*  
488 *bronchiseptica* adenylate cyclase toxin by manipulating host immunity. *Infect*  
489 *Immun* 67:1493-500.
- 490 40. Schijns VE, Lavelle EC. 2011. Trends in vaccine adjuvants. *Expert Rev Vaccines*  
491 10:539-50.
- 492 41. McGuirk P, McCann C, Mills KH. 2002. Pathogen-specific T regulatory 1 cells  
493 induced in the respiratory tract by a bacterial molecule that stimulates interleukin  
494 10 production by dendritic cells: a novel strategy for evasion of protective T  
495 helper type 1 responses by *Bordetella pertussis*. *J Exp Med* 195:221-31.
- 496 42. McGuirk P, Mills KH. 2000. Direct anti-inflammatory effect of a bacterial virulence  
497 factor: IL-10-dependent suppression of IL-12 production by filamentous  
498 hemagglutinin from *Bordetella pertussis*. *Eur J Immunol* 30:415-22.
- 499 43. Spensieri F, Fedele G, Fazio C, Nasso M, Stefanelli P, Mastrantonio P, Ausiello  
500 CM. 2006. *Bordetella pertussis* inhibition of interleukin-12 (IL-12) p70 in human  
501 monocyte-derived dendritic cells blocks IL-12 p35 through adenylate cyclase  
502 toxin-dependent cyclic AMP induction. *Infect Immun* 74:2831-8.

- 503 44. Fedele G, Celestino I, Spensieri F, Frasca L, Nasso M, Watanabe M, Remoli ME,  
504 Coccia EM, Altieri F, Ausiello CM. 2007. Lipooligosaccharide from *Bordetella*  
505 *pertussis* induces mature human monocyte-derived dendritic cells and drives a  
506 Th2 biased response. *Microbes Infect* 9:855-63.
- 507 45. Nagamatsu K, Kuwae A, Konaka T, Nagai S, Yoshida S, Eguchi M, Watanabe M,  
508 Mimuro H, Koyasu S, Abe A. 2009. *Bordetella* evades the host immune system  
509 by inducing IL-10 through a type III effector, BopN. *J Exp Med* 206:3073-88.
- 510 46. Register KB. 2001. Novel genetic and phenotypic heterogeneity in *Bordetella*  
511 *bronchiseptica* pertactin. *Infect Immun* 69:1917-21.
- 512 47. Register KB. 2004. Comparative sequence analysis of *Bordetella bronchiseptica*  
513 pertactin gene (*prn*) repeat region variants in swine vaccines and field isolates.  
514 *Vaccine* 23:48-57.
- 515 48. de Gouw D, Diavatopoulos DA, Bootsma HJ, Hermans PW, Mooi FR. 2011.  
516 Pertussis: a matter of immune modulation. *FEMS Microbiol Rev* 35:441-74.
- 517 49. Skinner JA, Piloni MR, Shen H, Harvill ET, Yuk MH. 2005. *Bordetella* type III  
518 secretion modulates dendritic cell migration resulting in immunosuppression and  
519 bacterial persistence. *J Immunol* 175:4647-52.
- 520 50. Brito LA, Singh M. 2011. Acceptable levels of endotoxin in vaccine formulations  
521 during preclinical research. *J Pharm Sci* 100:34-7.
- 522 51. Caution K, Yount K, Deora R, Dubey P. 2019. Evaluation of Host-Pathogen  
523 Responses and Vaccine Efficacy in Mice. *JoVE* doi:doi:10.3791/58930:e58930.

524

525



526 **FIGURE LEGENDS**

527 **Figure 1. Immunization with BcfA alone is as effective as BcfA/Alum to reduce *B.***  
528 ***bronchiseptica* colonization of the lungs and trachea.** Balb/c mice (N=5/group) were  
529 immunized, challenged with RB50, and sacrificed at 4 dpi. Lungs and trachea were  
530 homogenized, serially diluted, and plated for CFU enumeration. (A) Lung CFUs. (B)  
531 Trachea CFUs. NS = not significant.

532 **Figure 2. Immunization of mice with a monovalent BcfA vaccine or a trivalent**  
533 **vaccine with FHA and Prn reduces *B. bronchiseptica* bacterial burden from the**  
534 **lungs and trache**

535 Balb/c mice (N=8/group) were unimmunized (naïve) or immunized with FHA/Prn, BcfA,  
536 or BcfA/FHA/Prn, and challenged with RB50. Lung CFUs at (A) 3 dpi and (B) 7 dpi.  
537 Trachea CFUs at (C) 3 dpi and (D) 7 dpi. One representative experiment of 2 is shown.  
538 \* P < 0.05, \*\* P < 0.01, \*\*\* P < 0.001, \*\*\*\* P < 0.0001

539 **Figure 3. Immunization with BcfA alone or with BcfA/FHA/Prn elicits strong**  
540 **systemic and mucosal BcfA-specific Th1-type antibody responses.** BcfA-specific  
541 total IgG as well as antigen-specific isotypes IgG1, IgG2a, and IgG2b were quantified in  
542 serum and lung homogenates at 3-4 dpi by multiplex fluorescent assay (N=5-8/group).  
543 Results are log<sub>10</sub>-transformed and presented as relative fluorescence units with  
544 background subtracted. (A) BcfA-specific IgG in serum. (B) BcfA-specific IgG in lung  
545 homogenate. (C) BcfA-specific IgG2/IgG1 isotype ratios in serum. (D) BcfA-specific  
546 IgG2/IgG1 isotype ratios in lungs. \* P < 0.05, \*\* P < 0.01, \*\*\* P < 0.001, \*\*\*\* P < 0.0001

547 **Figure 4. The addition of BcfA to FHA/Prn immunization elicits Th1-type FHA- and**  
548 **Prn-specific antibody responses.** FHA- and Prn-specific total IgG and isotypes IgG1,  
549 IgG2a, and IgG2b were quantified in serum and lung homogenates at 3-4 dpi by  
550 multiplex fluorescent assay (N=8/group). Results are log<sub>10</sub>-transformed and presented  
551 as relative fluorescence units with background subtracted. (A) FHA-specific IgG in  
552 serum. (B) Prn-specific IgG in serum. (C) FHA-specific IgG in lung homogenate. (D)  
553 Prn-specific IgG in lung homogenate. (E) FHA-specific IgG2/IgG1 isotype ratios in  
554 serum. (F) Prn-specific IgG2/IgG1 isotype ratios in serum. (G) FHA-specific IgG2/IgG1  
555 isotype ratios in lung homogenate. \* P < 0.05, \*\* P < 0.01

556 **Figure 5. BcfA/FHA/Prn immunization attenuates Th2 cytokines IL-5 and IL-13**  
557 **compared to FHA/Prn immunization.** Splenocytes harvested from Balb/C mice  
558 (N=8/group) at 3 dpi were stimulated *in vitro* with medium alone (NS) or with 1 µg/ml  
559 FHA, Prn, or BcfA for 7 days. (A) IL-5, (B) IL-13, (C) IFN $\gamma$ , and (D) IL-17 in culture  
560 supernatants were quantified by ELISA. \* P < 0.05, \*\* P < 0.01, \*\*\*\* P < 0.0001

561 **Figure 6. BcfA/FHA/Prn immunization is more effective and elicits a stronger**  
562 **antibody response than Bronchicine<sup>®</sup>.** Balb/c mice (N=6-16/group) were immunized  
563 and challenged with RB50 or MBORD 685. CFUs from (A) lungs and (B) trachea on  
564 7dpi. Antigen-specific total IgG in (C) serum and (D) lung homogenate. Data are log<sub>10</sub>-  
565 transformed relative fluorescence units with background subtracted. \* P < 0.05, \*\* P <  
566 0.01, \*\*\* P < 0.001, \*\*\*\* P < 0.0001

567 **Figure 7. BcfA-containing vaccines and Bronchicine<sup>®</sup> reduce lung injury and elicit**  
568 **characteristically different cell infiltrates.** Balb/c mice (N=5-6/group) were  
569 immunized, challenged with RB50, and sacrificed 3-4 dpi. H&E stained lung sections (A-

570 D) were scored qualitatively from 0-5 for (E) total pathology score, (F) degeneration and  
571 necrosis, (G) infiltrating airway PMNs, and (H) infiltrating lymphocytes and plasma cells.  
572 Scale bar in A-D, 200  $\mu$ m. \* P < 0.05, \*\* P < 0.01, \*\*\* P < 0.001

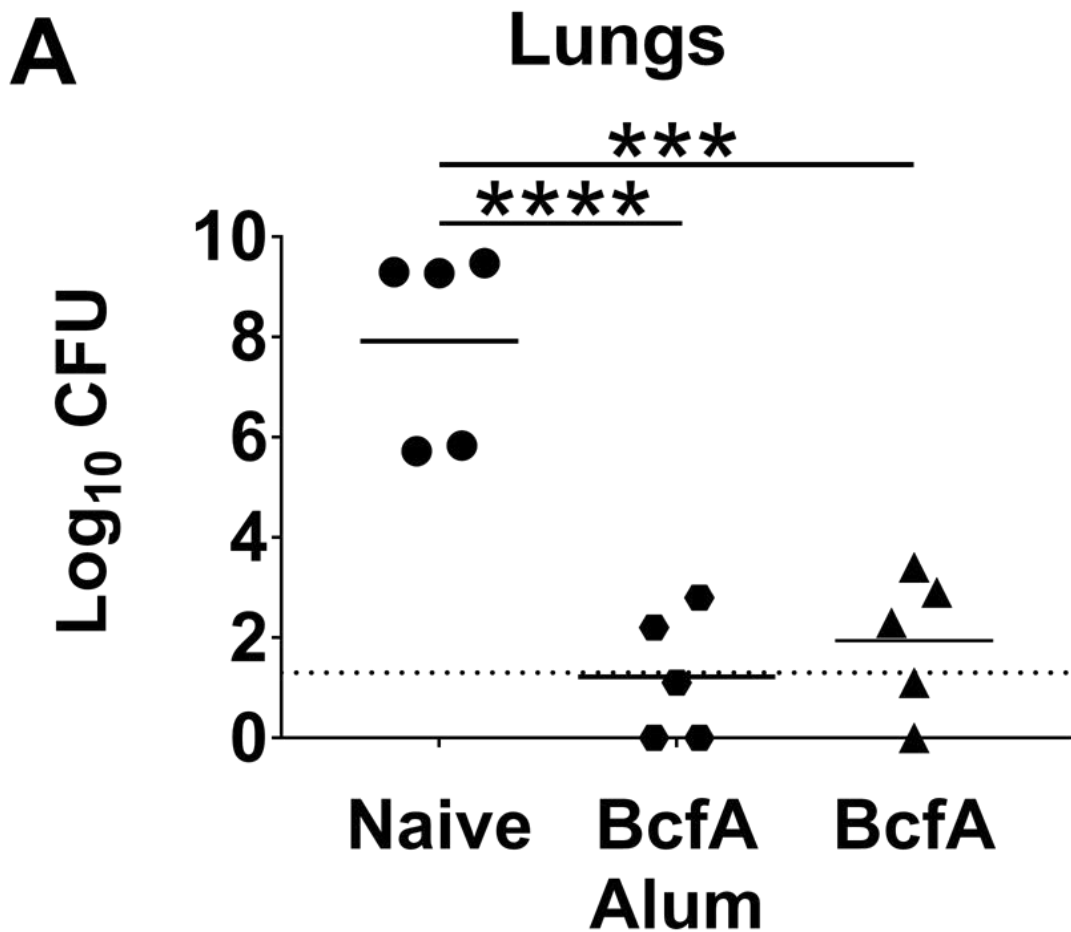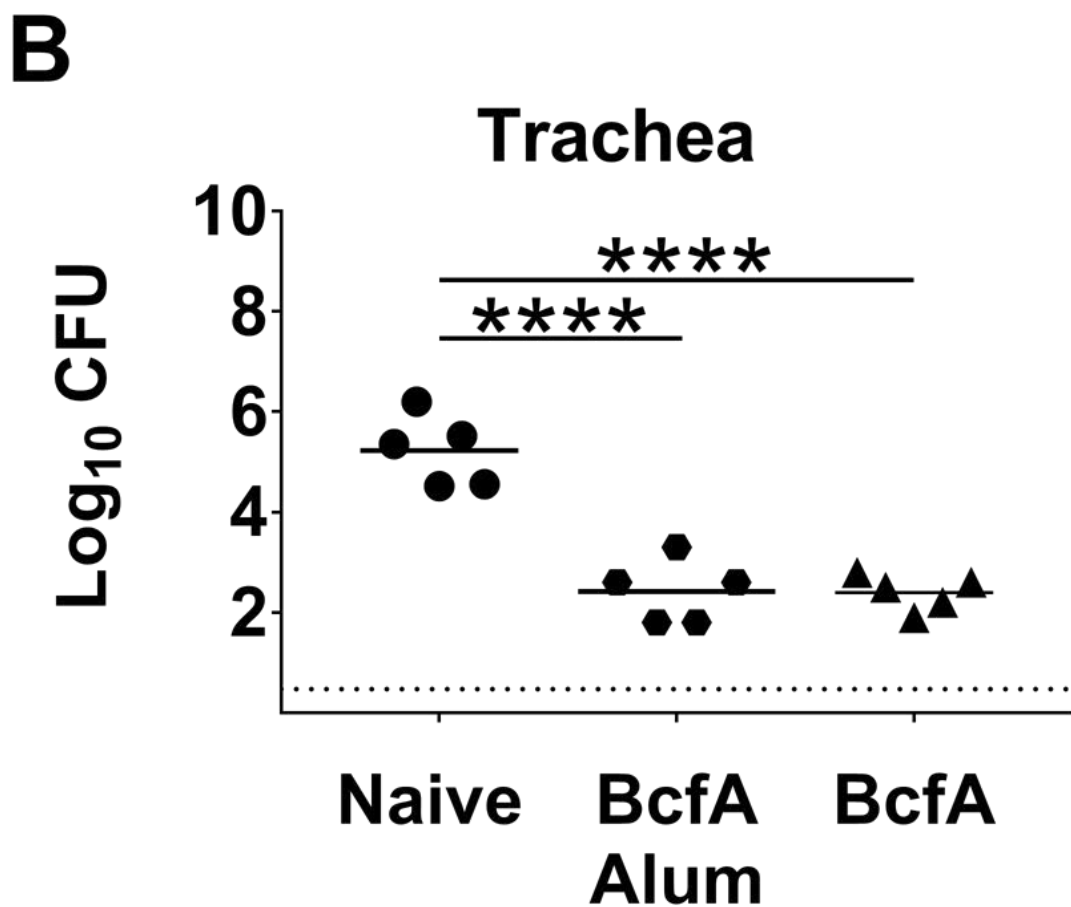

**A**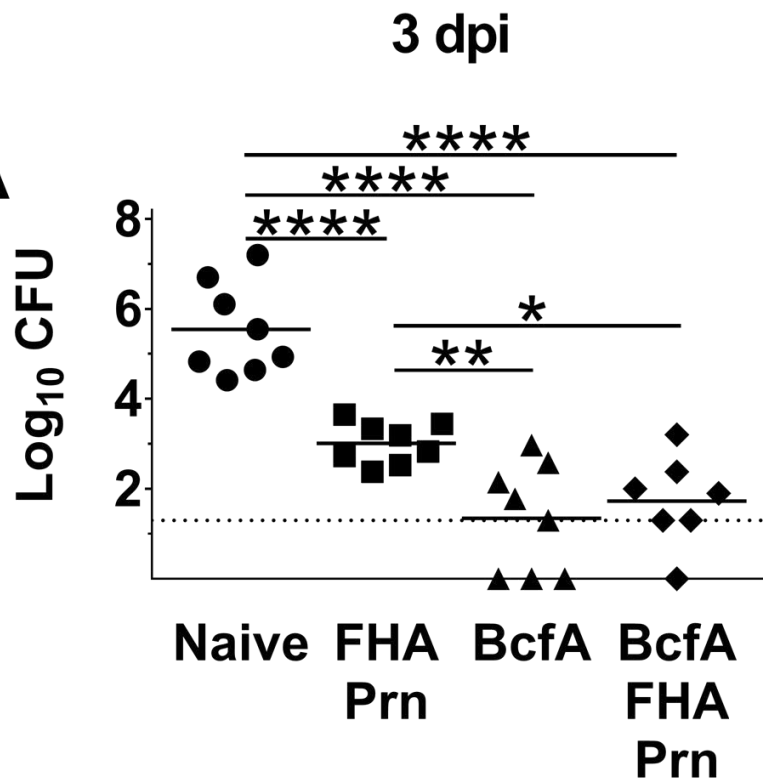**B**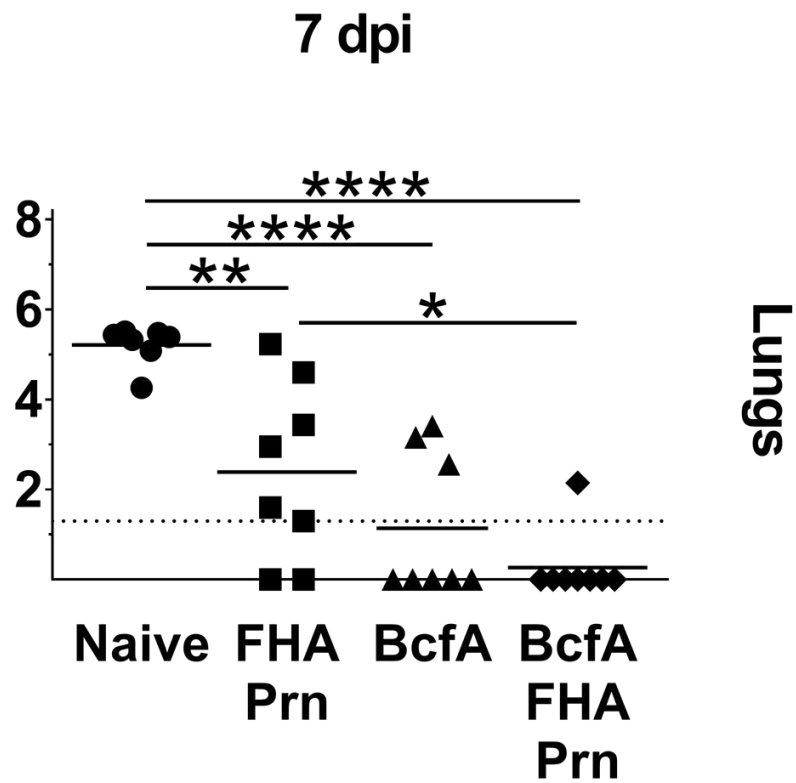**C**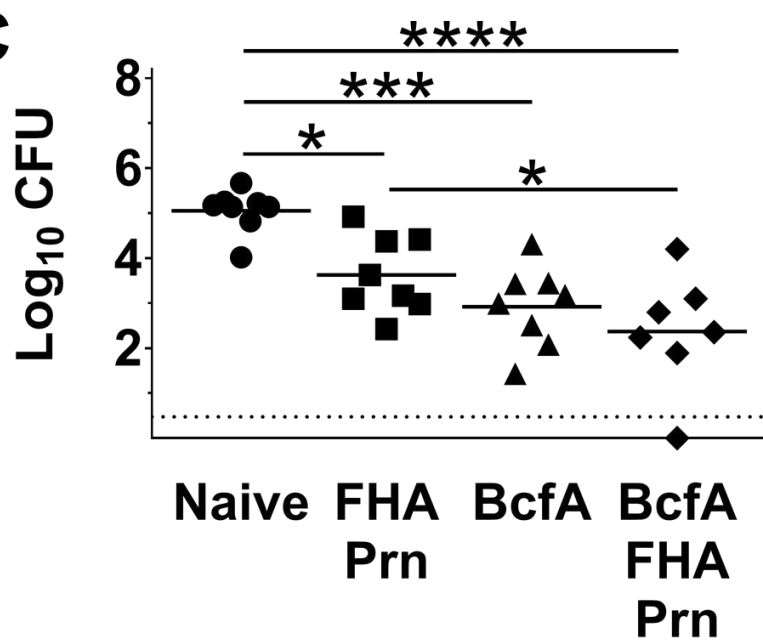**D**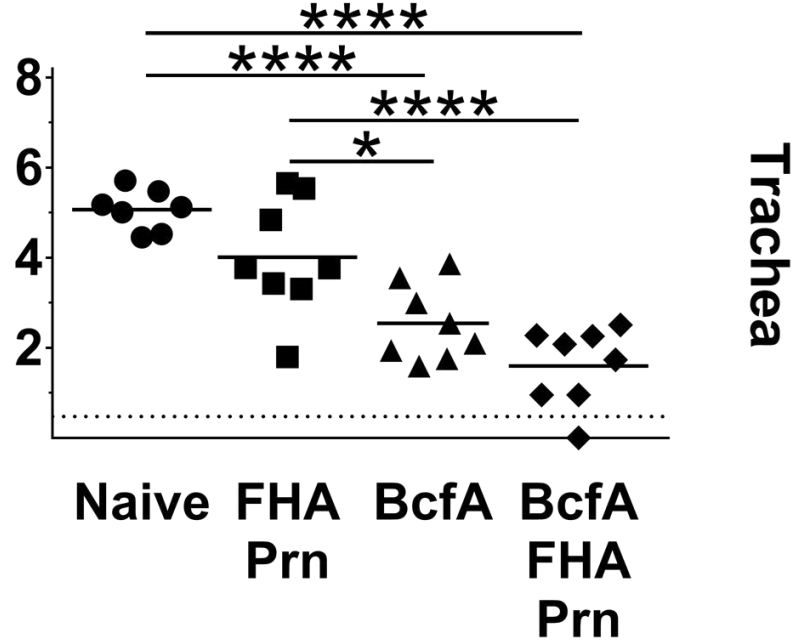

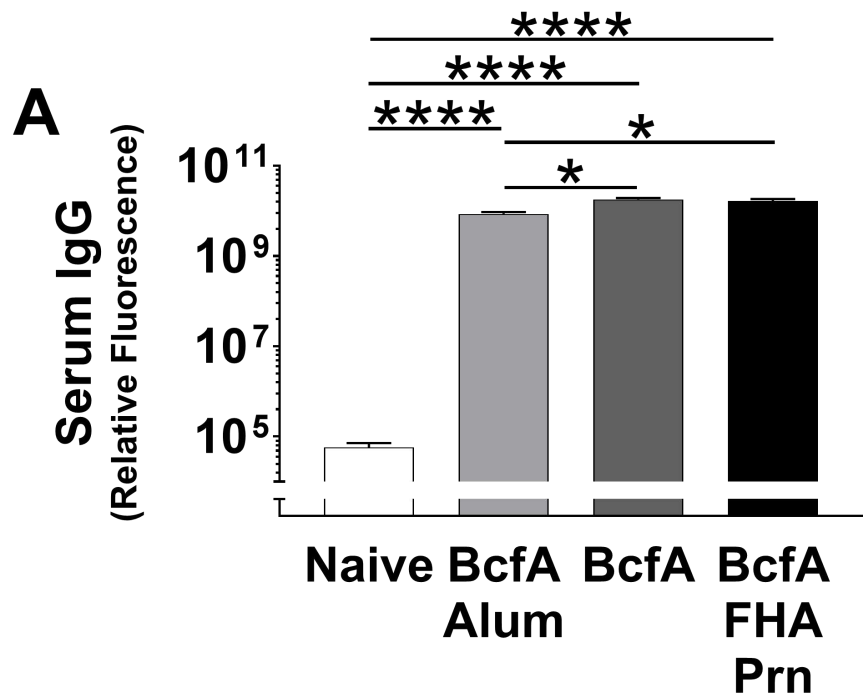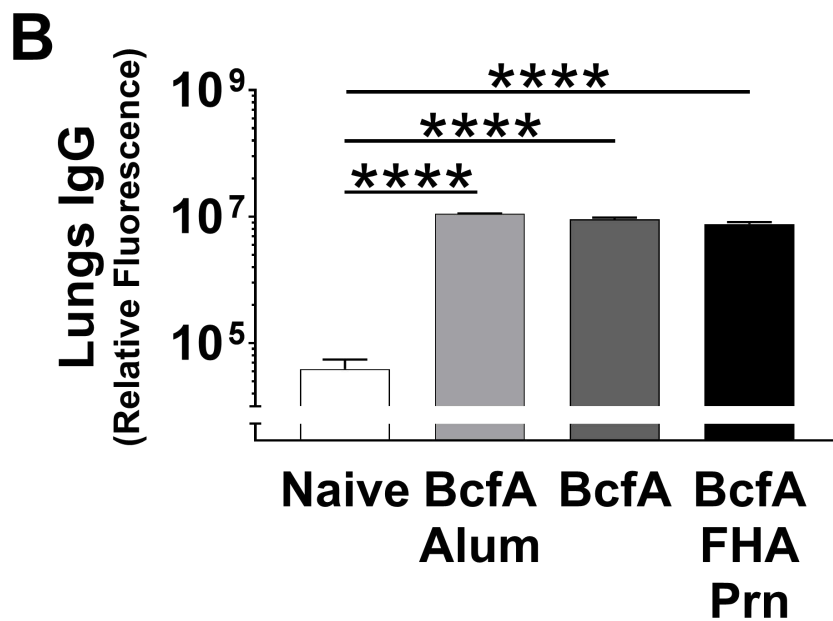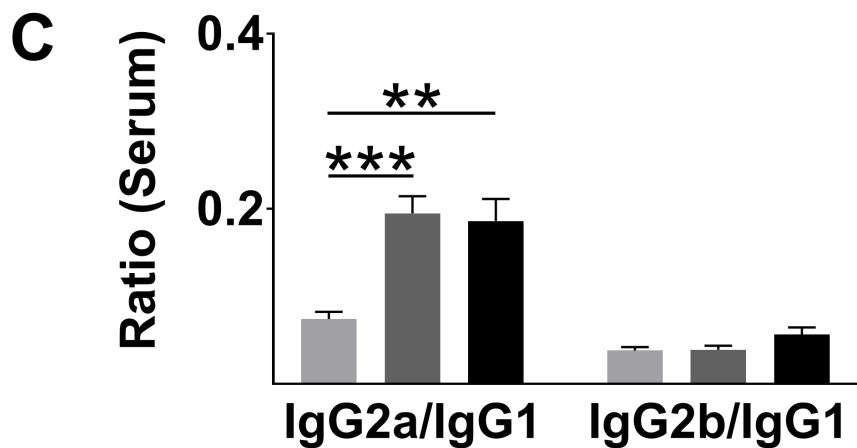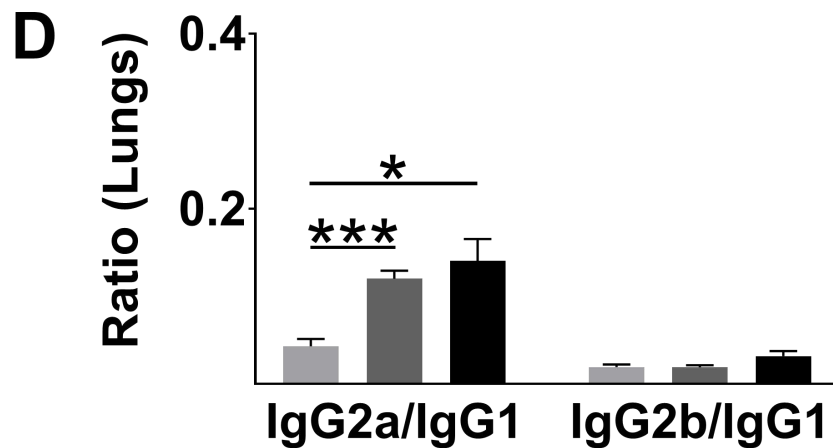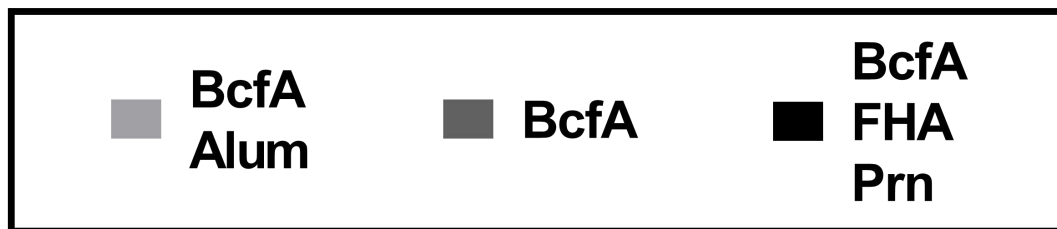



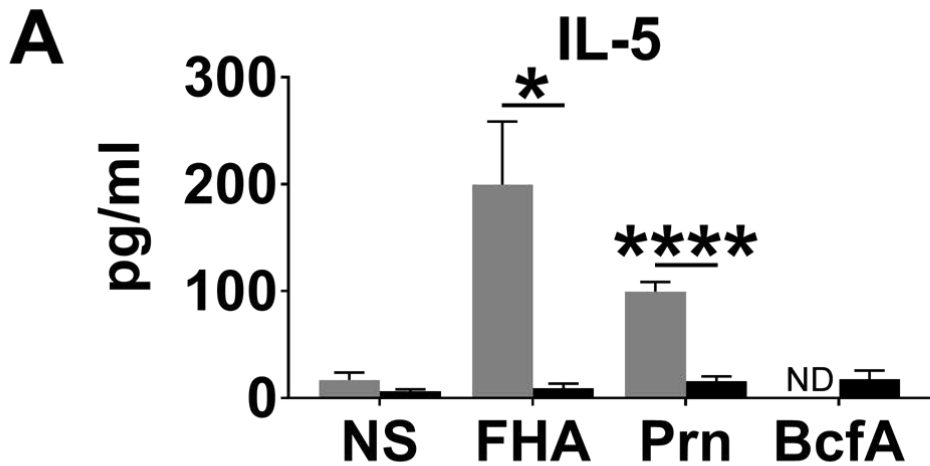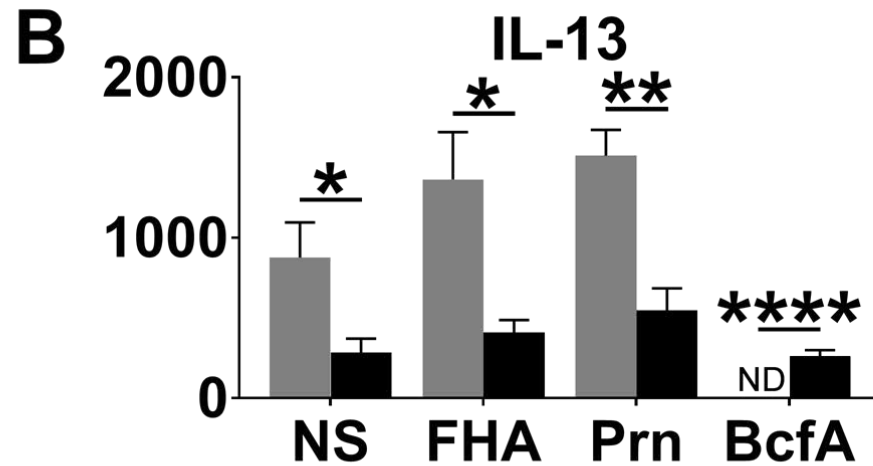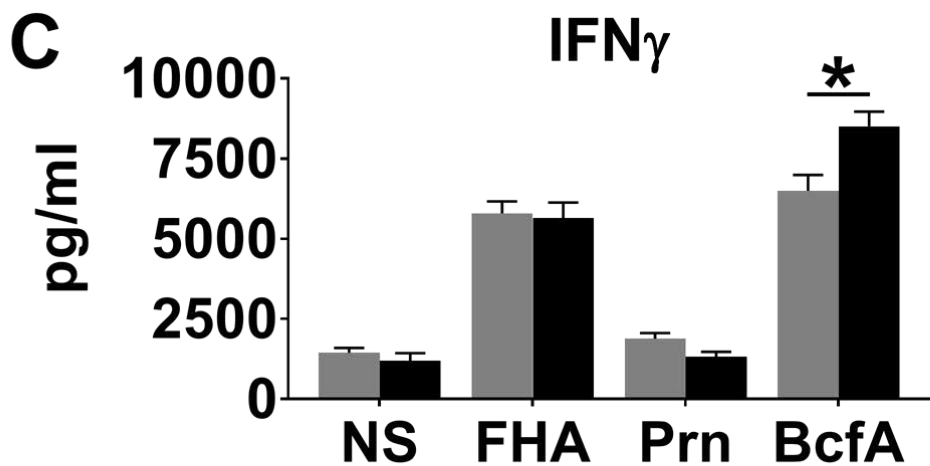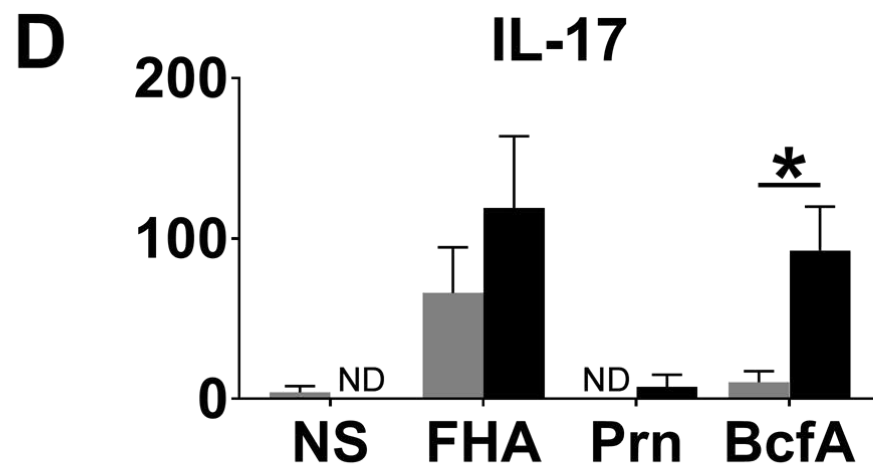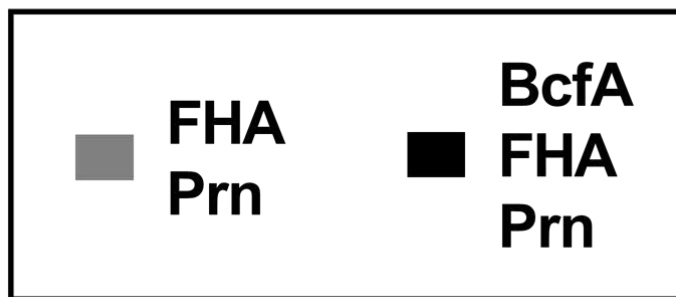





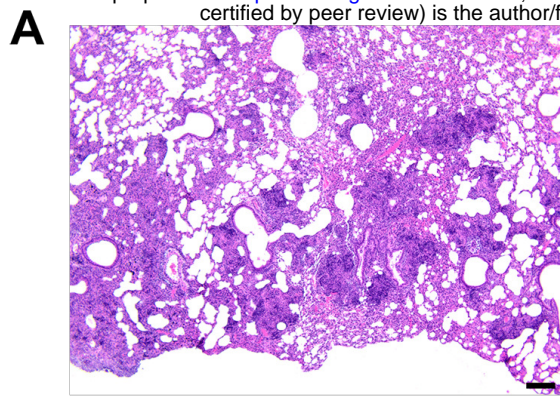

Naive

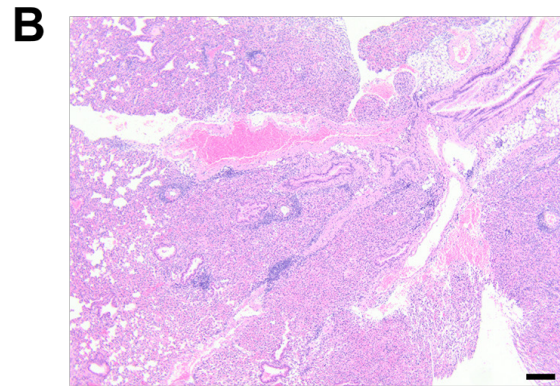

Bronchicine

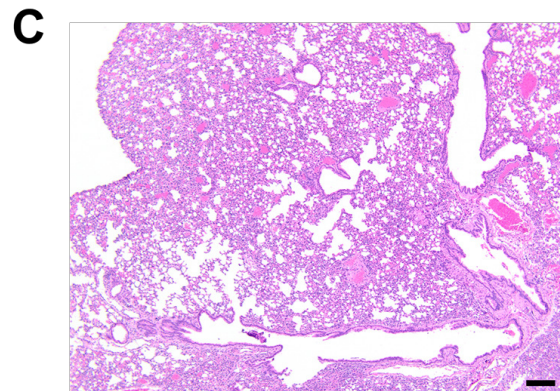

BcfA

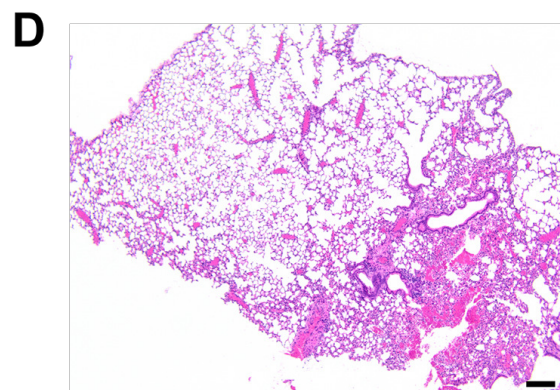

BcfA/FHA/Prn

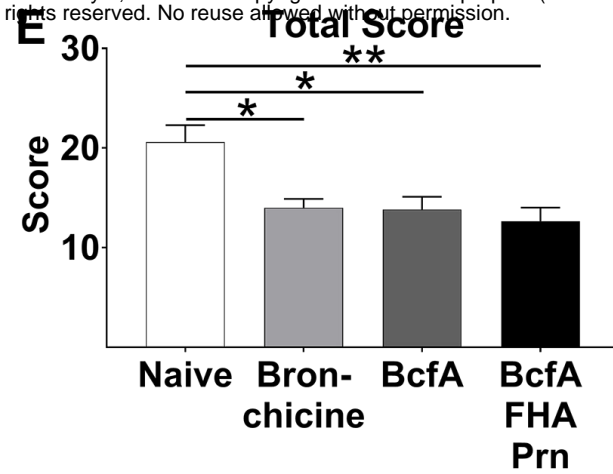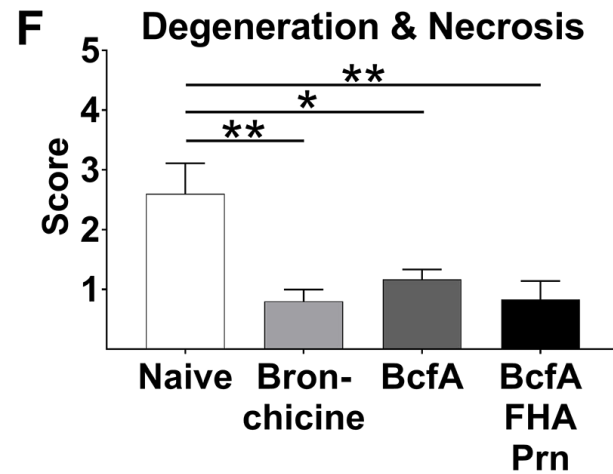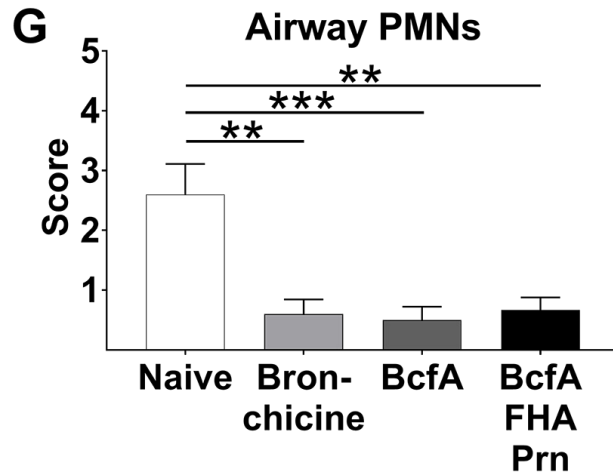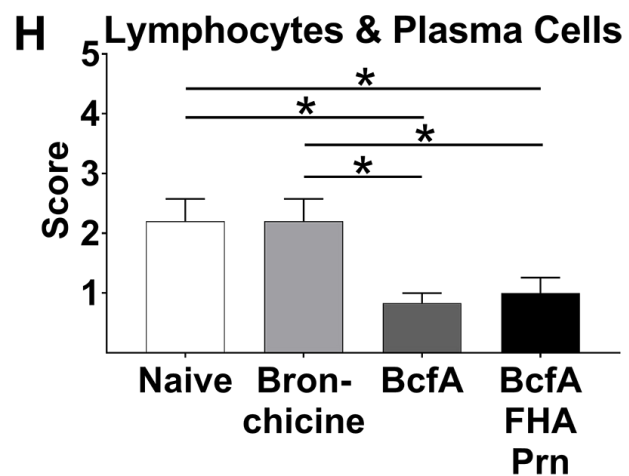

Source: http://biorxiv.org/content/10.1101/692830v1.full.pdf
